# Supplementary material for: Nitro rotation tuned dissociative electron attachment upon targeted radiosensitizer 4-substituted Z bases
Source: Royal Society of Chemistry journal article supplement (doi:10.1039/d2cp00351a), 2022-01-01
Supplement: d2cp00351a1.pdf [file d2cp00351a1.pdf]

# Nitro rotation tuned dissociative electron attachment upon targeted radiosensitizers 4-substituted Z bases

Xixi Cui, Yu Zhao, Changzhe Zhang\*, Qingtian Meng\*

*College of Physics and Electronics, Shandong Normal University, Jinan 250358, Shandong, China*

*\*E-mail: zhe852456@126.com and qtmeng@sdu.edu.cn*

## Supporting Information

### Contents

1. The major bond lengths (Å) and angles (°) of Z base and 4XZ bases: Tables S1-S3.
2. The intrinsic reaction coordinates of 4XZ anion radicals: Fig. S1.
3. The potential energy curves (PECs) of 4XZ bases and anion radicals along the C4-X bond stretching: Fig. S2.
4. The molecular orbitals and energies for the optimized anionic 4XZ: Fig. S3, Tables S4-S5.
5. The molecular orbitals of 4XZ bases: Table S6.
6. The potential energy surfaces (PESs) of 4XZ anion radicals as the function of C4-X bond dissociation and nitro-rotation: Fig. S4.
7. Thermodynamic and kinetic characteristics for degradation of 4XZ bases with the rotational displacements of  $\delta=0^\circ$ ,  $30^\circ$ ,  $60^\circ$  and  $90^\circ$ : Table S7.
8. The electron distribution and  $C_{\text{ele}}$  diagrams of 4XZ anion radicals with the rotational displacements of  $\delta=0^\circ$ ,  $20^\circ$ ,  $40^\circ$ ,  $60^\circ$  and  $80^\circ$ : Fig. S5, S6 and S7.
9. The geometric configurations of ZP and 4XZP bases: Fig. S8.
10. The major bond lengths (Å) and angles (°) of ZP and 4XZP bases: Tables S8-S10.
11. Electron affinity of ZP and 4XZP bases: Table S11.
12. The molecular orbitals of 4XZP bases: Table S12.
13. The PECs of 4XZP bases and anion radicals along the C4-X bond stretching: Fig. S9.

**Table S1** The major bond lengths (Å) and angles (°) of neutral Z base and 4XZ bases.

| Neutral                | Z           | 4FZ          | 4ClZ         | 4BrZ         | 4IZ          |
|------------------------|-------------|--------------|--------------|--------------|--------------|
| N1-H12(Å)              | 1.01        | 1.01         | 1.01         | 1.01         | 1.01         |
| C2-O9(Å)               | 1.23        | 1.23         | 1.23         | 1.23         | 1.23         |
| <b>C4-X(Å)</b>         | <b>1.08</b> | <b>1.34</b>  | <b>1.75</b>  | <b>1.95</b>  | <b>2.14</b>  |
| C5-N7(Å)               | 1.41        | 1.41         | 1.42         | 1.42         | 1.42         |
| C6-N8(Å)               | 1.33        | 1.33         | 1.33         | 1.33         | 1.33         |
| N7-O10(Å)              | 1.25        | 1.25         | 1.25         | 1.25         | 1.25         |
| N7-O11(Å)              | 1.24        | 1.23         | 1.23         | 1.23         | 1.23         |
| N8-H13(Å)              | 1.01        | 1.01         | 1.01         | 1.01         | 1.01         |
| N8-H14(Å)              | 1.01        | 1.01         | 1.01         | 1.01         | 1.01         |
| O10-N7-O11(°)          | 121.30      | 121.13       | 121.45       | 121.57       | 121.47       |
| H13-N8-H14(°)          | 120.74      | 120.72       | 120.36       | 120.27       | 120.26       |
| <b>C5-C6-N7-O10(°)</b> | <b>0.28</b> | <b>12.36</b> | <b>25.83</b> | <b>27.78</b> | <b>27.53</b> |

**Table S2** The major bond lengths (Å) and angles (°) of anionic Z base and 4XZ bases (reactant).

| Anion-Reactant         | Z           | 4FZ          | 4ClZ         | 4BrZ         | 4IZ          |
|------------------------|-------------|--------------|--------------|--------------|--------------|
| N1-H12(Å)              | 1.01        | 1.01         | 1.01         | 1.01         | 1.01         |
| C2-O9(Å)               | 1.25        | 1.24         | 1.24         | 1.24         | 1.24         |
| <b>C4-X(Å)</b>         | <b>1.08</b> | <b>1.35</b>  | <b>1.76</b>  | <b>1.96</b>  | <b>2.14</b>  |
| C5-N7(Å)               | 1.40        | 1.42         | 1.43         | 1.43         | 1.44         |
| C6-N8(Å)               | 1.37        | 1.36         | 1.36         | 1.36         | 1.36         |
| N7-O10(Å)              | 1.32        | 1.32         | 1.32         | 1.32         | 1.32         |
| N7-O11(Å)              | 1.30        | 1.30         | 1.30         | 1.30         | 1.30         |
| N8-H13(Å)              | 1.01        | 1.01         | 1.01         | 1.01         | 1.01         |
| N8-H14(Å)              | 1.02        | 1.02         | 1.02         | 1.02         | 1.02         |
| O10-N7-O11(°)          | 120.17      | 120.84       | 120.63       | 120.54       | 120.35       |
| H13-N8-H14(°)          | 117.49      | 116.19       | 116.02       | 115.95       | 115.52       |
| <b>C5-C6-N7-O10(°)</b> | <b>9.24</b> | <b>33.43</b> | <b>42.30</b> | <b>45.10</b> | <b>47.09</b> |

**Table S3** The major bond lengths (Å) and angles (°) of anionic Z base and 4XZ bases (product).

| Anion-Product          | Z | 4FZ          | 4ClZ         | 4BrZ         | 4IZ          |
|------------------------|---|--------------|--------------|--------------|--------------|
| N1-H12(Å)              | / | 1.01         | 1.01         | 1.01         | 1.01         |
| C2-O9(Å)               | / | 1.22         | 1.23         | 1.23         | 1.23         |
| <b>C4-X(Å)</b>         | / | <b>3.97</b>  | <b>4.06</b>  | <b>2.85</b>  | <b>3.01</b>  |
| C5-N7(Å)               | / | 1.40         | 1.40         | 1.41         | 1.41         |
| C6-N8(Å)               | / | 1.33         | 1.33         | 1.33         | 1.33         |
| N7-O10(Å)              | / | 1.25         | 1.25         | 1.26         | 1.26         |
| N7-O11(Å)              | / | 1.24         | 1.24         | 1.24         | 1.24         |
| N8-H13(Å)              | / | 1.01         | 1.01         | 1.01         | 1.01         |
| N8-H14(Å)              | / | 1.01         | 1.01         | 1.01         | 1.01         |
| O10-N7-O11(°)          | / | 122.08       | 121.90       | 121.27       | 121.25       |
| H13-N8-H14(°)          | / | 120.45       | 120.18       | 120.61       | 120.64       |
| <b>C5-C6-N7-O10(°)</b> | / | <b>-0.35</b> | <b>-2.51</b> | <b>15.33</b> | <b>15.65</b> |

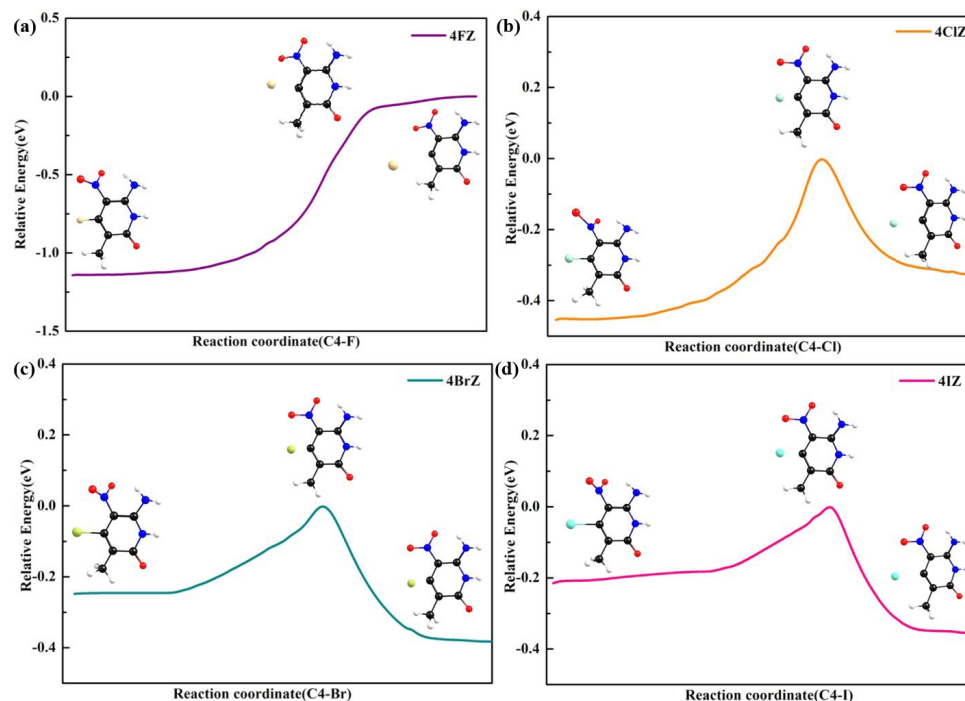

**Fig. S1** The intrinsic reaction coordinates of 4XZ anion radicals. The energy of the optimized transition state in Fig. 2 is set as reference. (a) 4FZ, (b) 4ClZ, (c) 4BrZ, (d) 4IZ.

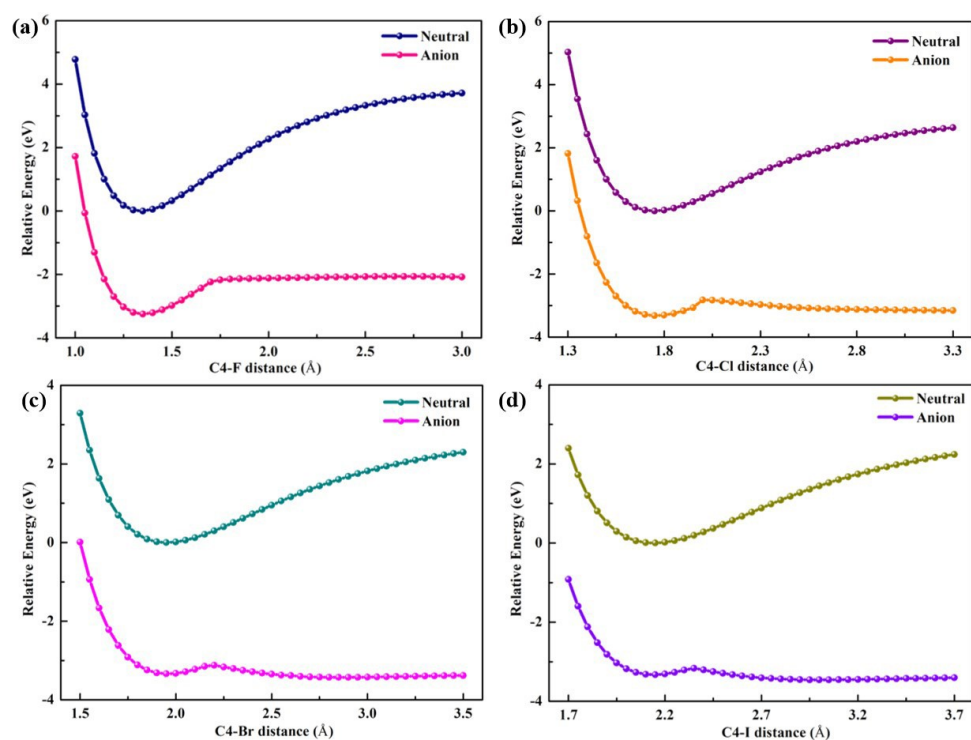

**Fig. S2** The PECs of 4XZ bases and anion radicals along the C4-X stretching. The energy of the optimized neutral molecule is set as reference. (a) 4FZ, (b) 4ClZ, (c) 4BrZ, (d) 4IZ.

**Table S4** The molecular orbitals for the optimized anionic 4XZ at different C-X bond lengths (X=I, Br).

| $R_{C-I}(\text{\AA})$ | HOMO | LUMO | $R_{C-Br}(\text{\AA})$ | HOMO | LUMO |
|-----------------------|------|------|------------------------|------|------|
| 2.00                  |      |      | 1.85                   |      |      |
| 2.10                  |      |      | 1.95                   |      |      |
| 2.20                  |      |      | 2.04                   |      |      |
| 2.30                  |      |      | 2.13                   |      |      |
| 2.40                  |      |      | 2.22                   |      |      |
| 2.60                  |      |      | 2.40                   |      |      |
| 2.80                  |      |      | 2.60                   |      |      |
| 3.0                   |      |      | 2.80                   |      |      |

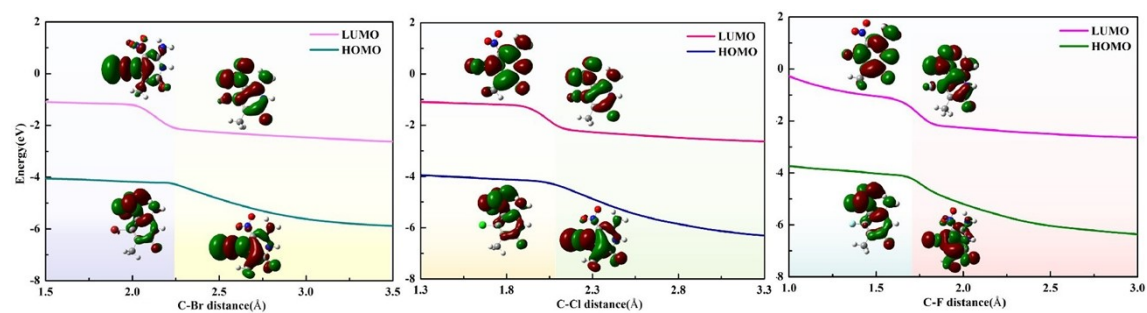

**Fig. S3** The molecular orbital energies for the optimized anionic 4XZ as a function of the C-X distance (X=Br, Cl, F).

**Table S5** The molecular orbitals for the optimized anionic 4XZ at different C-X bond lengths (X=Cl, F).

| $R_{C-Cl}(\text{Å})$ | HOMO | LUMO | $R_{C-F}(\text{Å})$ | HOMO | LUMO |
|----------------------|------|------|---------------------|------|------|
| 1.70                 |      |      | 1.30                |      |      |
| 1.80                 |      |      | 1.40                |      |      |
| 1.90                 |      |      | 1.50                |      |      |
| 2.00                 |      |      | 1.60                |      |      |
| 2.10                 |      |      | 1.70                |      |      |
| 2.30                 |      |      | 1.90                |      |      |
| 2.50                 |      |      | 2.10                |      |      |
| 2.70                 |      |      | 2.30                |      |      |

**Table S6** The molecular orbitals of neutral and anion radicals for 4XZ bases. The purple transparent shade and green transparent shade are for positive and negative parts of the wave function (isovalue = 0.02), respectively.

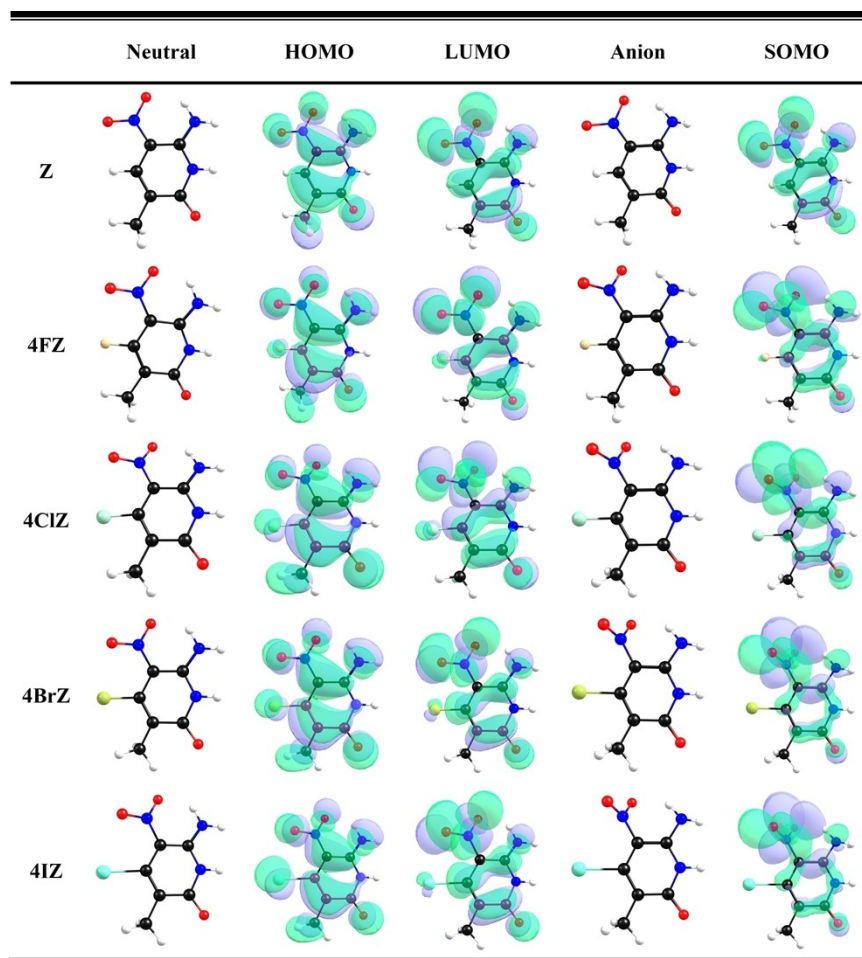



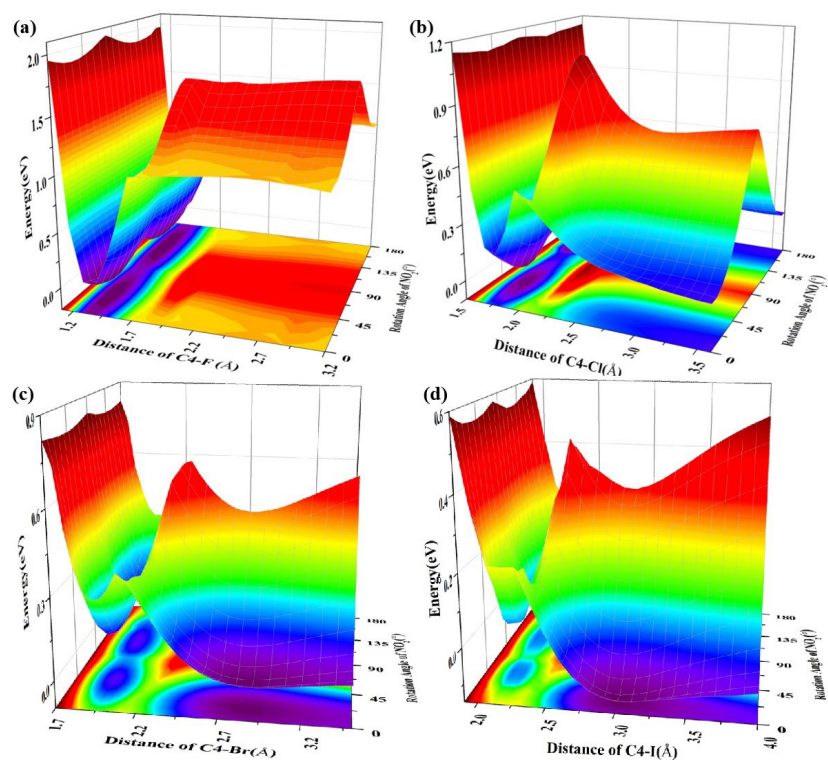

**Fig. S4** The PESs of 4XZ anion radicals as the function of C4-X bond dissociation and nitro-rotation. (a) 4FZ, (b) 4ClZ, (c) 4BrZ, (d) 4IZ.

**Table S7** Thermodynamic and kinetic characteristics for degradation of 4XZ bases with the rotational displacements of  $\delta=0^\circ, 30^\circ, 60^\circ$  and  $90^\circ$  (eV).

|                  | $XZ^- \rightarrow TS$ | $XZ^- \rightarrow [X \cdots Z]^-$ |
|------------------|-----------------------|-----------------------------------|
|                  | $\Delta E^*$          | $\Delta E_{PC}$                   |
| 4FZ- $0^\circ$   | 1.1070                | 1.0851                            |
| 4FZ- $30^\circ$  | 1.3689                | 1.3331                            |
| 4FZ- $60^\circ$  | 1.3586                | 1.3536                            |
| 4FZ- $90^\circ$  | 1.5980                | 1.5840                            |
| 4ClZ- $0^\circ$  | 0.3450                | -0.0142                           |
| 4ClZ- $30^\circ$ | 0.4975                | 0.2037                            |
| 4ClZ- $60^\circ$ | 0.7008                | 0.4371                            |
| 4ClZ- $90^\circ$ | 0.8634                | 0.6448                            |
| 4BrZ- $0^\circ$  | <b>0.0983</b>         | <b>-0.2746</b>                    |
| 4BrZ- $30^\circ$ | <b>0.2254</b>         | <b>-0.0935</b>                    |
| 4BrZ- $60^\circ$ | 0.3903                | 0.1353                            |
| 4BrZ- $90^\circ$ | 0.5572                | 0.3733                            |
| 4IZ- $0^\circ$   | <b>0.0466</b>         | <b>-0.3231</b>                    |
| 4IZ- $30^\circ$  | <b>0.1614</b>         | <b>-0.1379</b>                    |
| 4IZ- $60^\circ$  | 0.3397                | 0.1043                            |
| 4IZ- $90^\circ$  | 0.4687                | 0.2980                            |



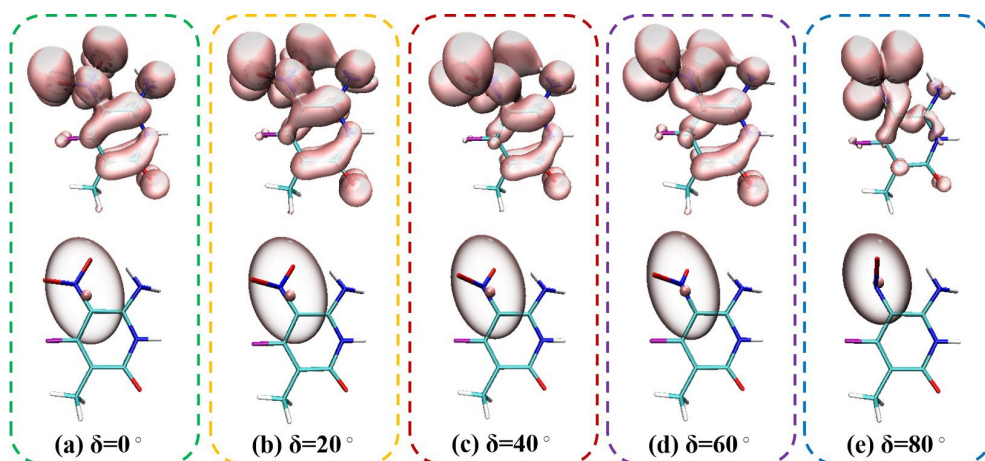

**Fig. S5** Electron distribution (upper panel) (isovalue=0.002) and  $C_{\text{ele}}$  diagrams (lower panel) (isovalue=0.002) of 4FZ anions with the rotational displacements of  $\delta=0^\circ$ ,  $20^\circ$ ,  $40^\circ$ ,  $60^\circ$  and  $80^\circ$ . The solid pink ball represents the centroid of electrons.

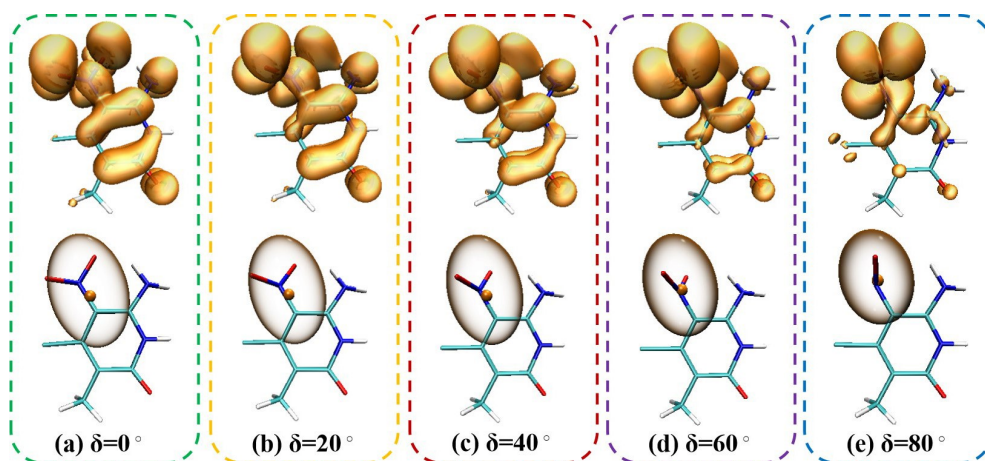

**Fig. S6** Electron distribution (upper panel) (isovalue=0.002) and  $C_{\text{ele}}$  diagrams (lower panel) (isovalue=0.002) of 4ClZ anions with the rotational displacements of  $\delta=0^\circ$ ,  $20^\circ$ ,  $40^\circ$ ,  $60^\circ$  and  $80^\circ$ . The solid orange ball represents the centroid of electrons.

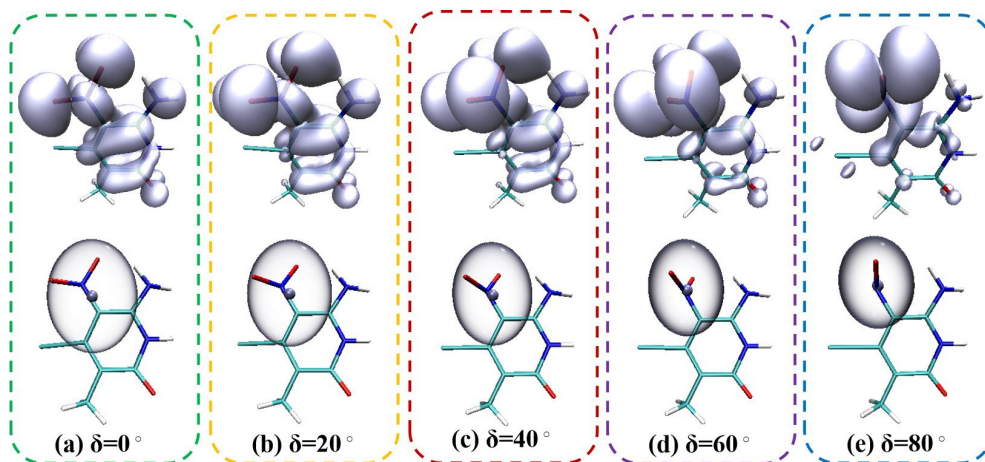

**Fig. S7** Electron distribution (upper panel) (isovalue=0.002) and  $C_{\text{ele}}$  diagrams (lower panel) (isovalue=0.002) of 4IZ anions with the rotational displacements of  $\delta=0^\circ$ ,  $20^\circ$ ,  $40^\circ$ ,  $60^\circ$  and  $80^\circ$ . The solid iceblue ball represents the centroid of electrons.

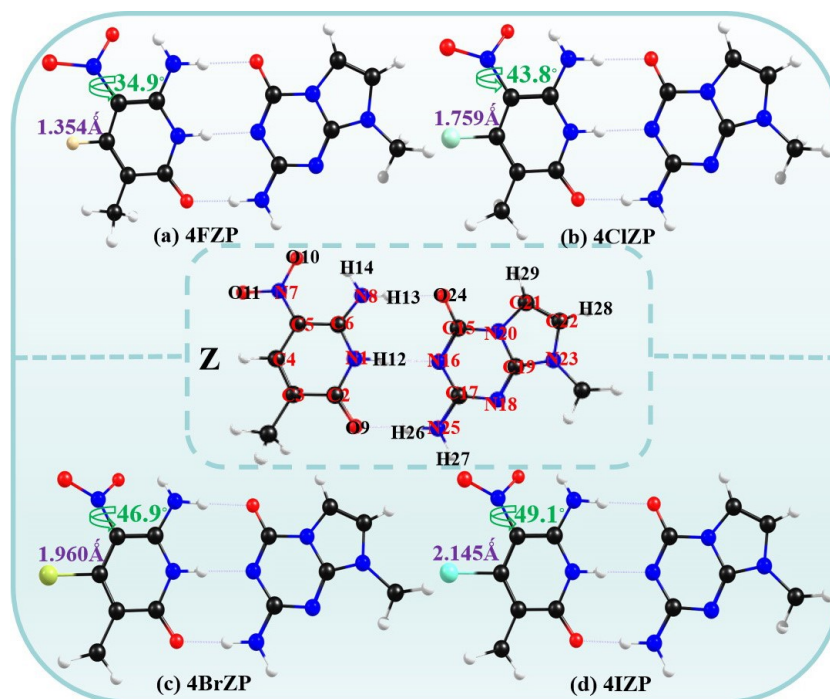

**Fig. S8** The geometric configurations of ZP and 4XZP bases.

**Table S8** The major bond lengths (Å) and angles (°) of neutral ZP and 4XZP bases.

| Neutral                | ZP          | 4FZP         | 4ClZP        | 4BrZP        | 4IZP         |
|------------------------|-------------|--------------|--------------|--------------|--------------|
| N1-H12(Å)              | 1.04        | 1.04         | 1.04         | 1.04         | 1.04         |
| C2-O9(Å)               | 1.24        | 1.24         | 1.24         | 1.24         | 1.24         |
| <b>C4-X(Å)</b>         | <b>1.08</b> | <b>1.34</b>  | <b>1.75</b>  | <b>1.95</b>  | <b>2.14</b>  |
| C5-N7(Å)               | 1.40        | 1.41         | 1.41         | 1.41         | 1.41         |
| C6-N8(Å)               | 1.33        | 1.33         | 1.33         | 1.33         | 1.33         |
| N7-O10(Å)              | 1.26        | 1.25         | 1.25         | 1.25         | 1.25         |
| N7-O11(Å)              | 1.24        | 1.24         | 1.24         | 1.24         | 1.24         |
| N8-H13(Å)              | 1.03        | 1.03         | 1.03         | 1.03         | 1.03         |
| N8-H14(Å)              | 1.01        | 1.01         | 1.01         | 1.01         | 1.01         |
| O9···N26(Å)            | 1.85        | 1.85         | 1.85         | 1.85         | 1.85         |
| H12···N16(Å)           | 1.86        | 1.85         | 1.86         | 1.85         | 1.85         |
| H13···O24(Å)           | 1.79        | 1.78         | 1.78         | 1.78         | 1.78         |
| N25-H26(Å)             | 1.02        | 1.02         | 1.02         | 1.02         | 1.02         |
| O10-N7-O11(°)          | 121.04      | 120.84       | 121.16       | 121.28       | 121.19       |
| H13-N8-H14(°)          | 121.38      | 121.26       | 120.96       | 120.96       | 120.96       |
| N1-H12···N16(°)        | 179.27      | 178.98       | 178.84       | 178.73       | 178.94       |
| N8-H13···O24(°)        | 177.77      | 176.77       | 176.60       | 176.69       | 176.90       |
| O9···H26-N25(°)        | 176.96      | 176.59       | 176.30       | 176.18       | 176.07       |
| <b>C5-C6-N7-O10(°)</b> | <b>0.24</b> | <b>11.81</b> | <b>25.56</b> | <b>27.30</b> | <b>27.20</b> |

**Table S9** The major bond lengths (Å) and angles (°) of anionic ZP and 4XZP bases (reactant).

| Anion-Reactant         | ZP           | 4FZP         | 4ClZP        | 4BrZP        | 4IZP         |
|------------------------|--------------|--------------|--------------|--------------|--------------|
| N1-H12(Å)              | 1.03         | 1.04         | 1.04         | 1.04         | 1.04         |
| C2-O9(Å)               | 1.27         | 1.26         | 1.26         | 1.26         | 1.26         |
| <b>C4-X(Å)</b>         | <b>1.08</b>  | <b>1.35</b>  | <b>1.76</b>  | <b>1.96</b>  | <b>2.14</b>  |
| C5-N7(Å)               | 1.40         | 1.42         | 1.43         | 1.43         | 1.43         |
| C6-N8(Å)               | 1.35         | 1.35         | 1.35         | 1.35         | 1.35         |
| N7-O10(Å)              | 1.32         | 1.32         | 1.32         | 1.32         | 1.32         |
| N7-O11(Å)              | 1.30         | 1.30         | 1.31         | 1.31         | 1.31         |
| N8-H13(Å)              | 1.02         | 1.02         | 1.02         | 1.02         | 1.02         |
| N8-H14(Å)              | 1.02         | 1.02         | 1.02         | 1.02         | 1.02         |
| O9···N26(Å)            | 1.77         | 1.80         | 1.80         | 1.80         | 1.80         |
| H12···N16(Å)           | 1.90         | 1.88         | 1.88         | 1.88         | 1.88         |
| H13···O24(Å)           | 1.91         | 1.91         | 1.90         | 1.90         | 1.90         |
| N25-H26(Å)             | 1.03         | 1.03         | 1.03         | 1.03         | 1.03         |
| O10-N7-O11(°)          | 119.98       | 120.80       | 120.60       | 120.47       | 120.26       |
| H13-N8-H14(°)          | 121.81       | 118.89       | 118.53       | 118.34       | 117.87       |
| N1-H12···N16(°)        | 178.41       | 177.25       | 178.38       | 178.53       | 177.73       |
| N8-H13···O24(°)        | 176.90       | 176.71       | 176.26       | 176.43       | 177.04       |
| O9···H26-N25(°)        | 179.18       | 178.65       | 178.71       | 178.53       | 178.45       |
| <b>C5-C6-N7-O10(°)</b> | <b>-8.12</b> | <b>34.88</b> | <b>43.78</b> | <b>46.91</b> | <b>49.08</b> |

**Table S10** The major bond lengths (Å) and angles (°) of anionic ZP and 4XZP bases (product).

| Anion-Product          | ZP | 4FZP        | 4ClZP       | 4BrZP        | 4IZP         |
|------------------------|----|-------------|-------------|--------------|--------------|
| N1-H12(Å)              | /  | 1.04        | 1.04        | 1.04         | 1.04         |
| C2-O9(Å)               | /  | 1.24        | 1.24        | 1.24         | 1.24         |
| <b>C4-X(Å)</b>         | /  | <b>3.98</b> | <b>3.98</b> | <b>2.95</b>  | <b>3.05</b>  |
| C5-N7(Å)               | /  | 1.40        | 1.40        | 1.41         | 1.41         |
| C6-N8(Å)               | /  | 1.32        | 1.33        | 1.33         | 1.33         |
| N7-O10(Å)              | /  | 1.25        | 1.25        | 1.26         | 1.26         |
| N7-O11(Å)              | /  | 1.24        | 1.24        | 1.24         | 1.24         |
| N8-H13(Å)              | /  | 1.03        | 1.03        | 1.03         | 1.03         |
| N8-H14(Å)              | /  | 1.01        | 1.01        | 1.01         | 1.01         |
| O9···N26(Å)            | /  | 1.86        | 1.86        | 1.84         | 1.83         |
| H12···N16(Å)           | /  | 1.86        | 1.86        | 1.87         | 1.87         |
| H13···O24(Å)           | /  | 1.78        | 1.78        | 1.81         | 1.82         |
| N25-H26(Å)             | /  | 1.02        | 1.02        | 1.02         | 1.02         |
| O10-N7-O11(°)          | /  | 121.81      | 121.80      | 121.15       | 121.07       |
| H13-N8-H14(°)          | /  | 121.27      | 121.28      | 121.38       | 121.42       |
| N1-H12···N16(°)        | /  | 179.48      | 179.19      | 178.96       | 178.85       |
| N8-H13···O24(°)        | /  | 178.60      | 178.59      | 177.82       | 177.64       |
| O9···H26-N25(°)        | /  | 176.51      | 176.54      | 177.25       | 177.39       |
| <b>C5-C6-N7-O10(°)</b> | /  | <b>1.07</b> | <b>1.58</b> | <b>14.58</b> | <b>14.30</b> |

**Table S11** Electron affinity (eV) of ZP and 4XZP bases in water solution.

|              | VEA (eV) | AEA (eV) | VDE (eV) |
|--------------|----------|----------|----------|
| <b>ZP</b>    | 2.712    | 2.998    | 3.312    |
| <b>4FZP</b>  | 2.738    | 3.139    | 3.758    |
| <b>4ClZP</b> | 2.807    | 3.223    | 3.991    |
| <b>4BrZP</b> | 2.813    | 3.244    | 4.089    |
| <b>4IZP</b>  | 2.811    | 3.232    | 4.134    |

**Table S12** The molecular orbitals of neutral and anion radicals for 4XZP bases. The purple transparent shade and green transparent shade are for positive and negative parts of the wave function (isovalue = 0.02), respectively.

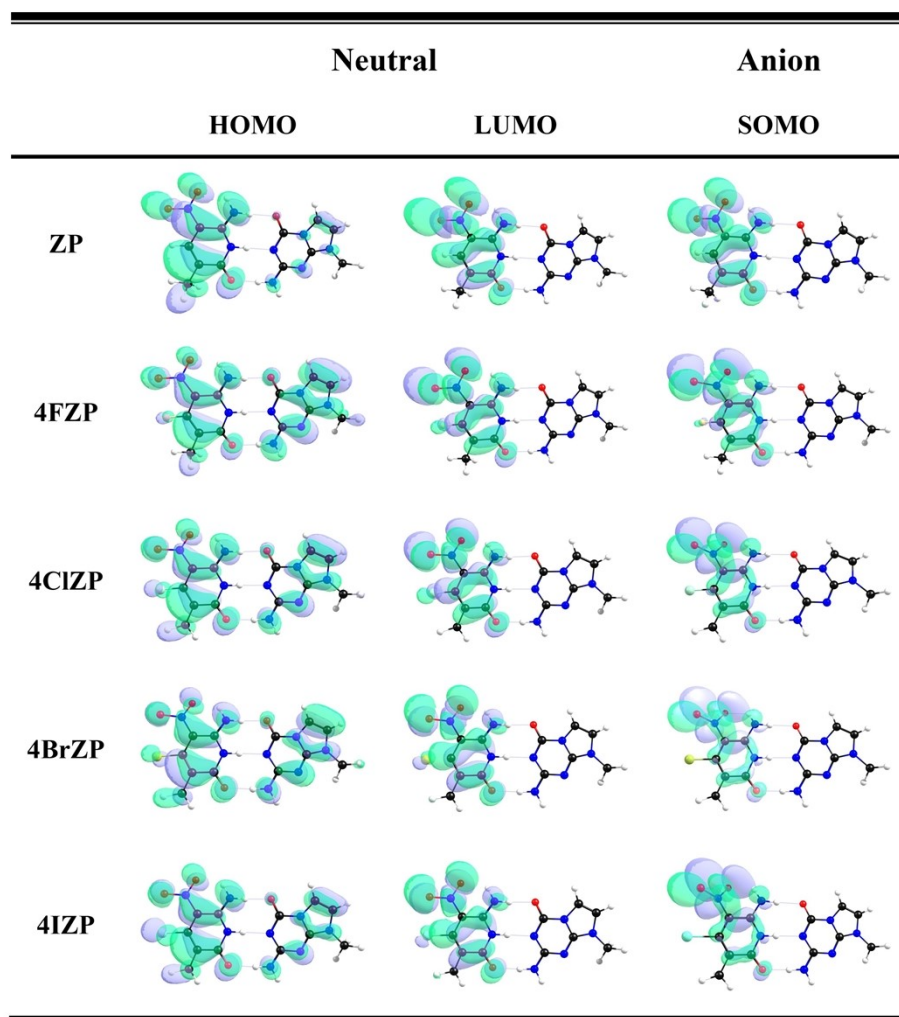

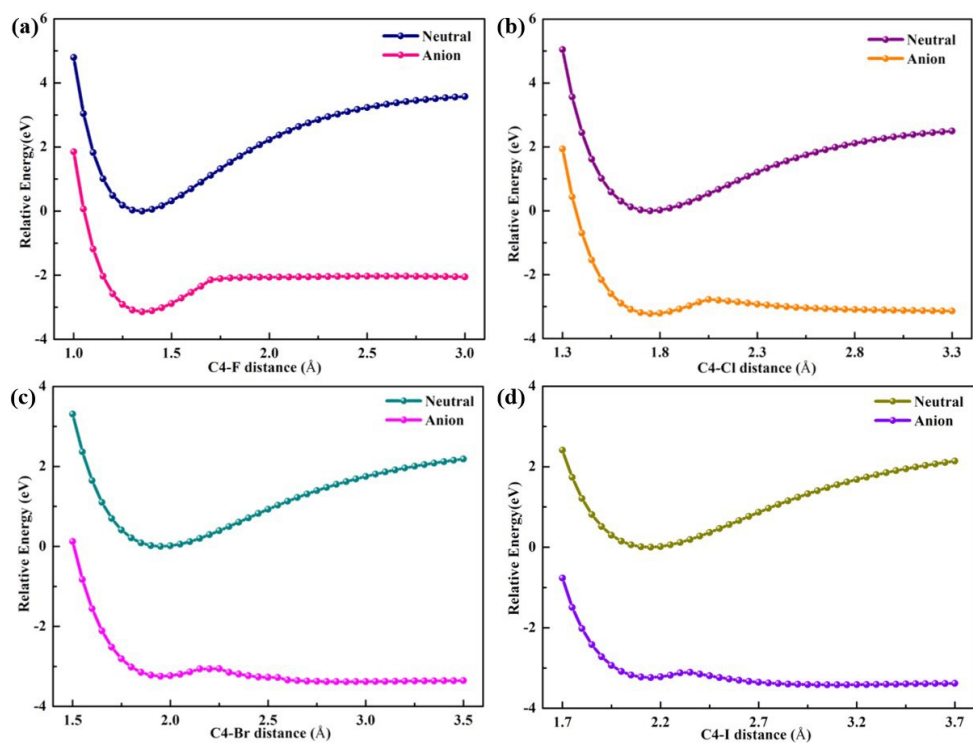

**Fig. S9** The PECs of 4XZP bases and anion radicals along the C4-X bond stretching. The energy of the optimized neutral molecule is set as reference. (a) 4FZP, (b) 4ClZP, (c) 4BrZP, (d) 4IZP.
